# Supplementary material for: A cobalt-based metal–organic framework and its derived material as sulfur hosts for aluminum–sulfur batteries with the chemical anchoring effect
Source: Royal Society of Chemistry journal article supplement (doi:10.1039/d1cp01232k), 2021-01-01
Supplement: d1cp01232k1.pdf [file d1cp01232k1.pdf]

## **Supplementary Information**

### **A cobalt-based metal–organic framework and its derived material as sulfur hosts for aluminum-sulfur batteries with chemical anchoring effect**

Xiang Xiao, Jiguo Tu, Zheng Huang, Shuqiang Jiao\*

State Key Laboratory of Advanced Metallurgy, University of Science and Technology Beijing,

Beijing 100083, PR China. \*Corresponding authors: sjiao@ustb.edu.cn (S Jiao)

**Table S1.** Calculated total energies of ZIF-67, ZIF-67-700, S<sub>8</sub>, Al<sub>2</sub>S<sub>3</sub>, Al<sub>2</sub>S<sub>6</sub>, Al<sub>2</sub>S<sub>12</sub>, Al<sub>2</sub>S<sub>18</sub>, and the corresponding adsorption models.

|                   | ZIF-67    | ZIF-67-700 | S <sub>8</sub>             | Al <sub>2</sub> S <sub>3</sub>             | Al <sub>2</sub> S <sub>6</sub>             | Al <sub>2</sub> S <sub>12</sub>             | Al <sub>2</sub> S <sub>18</sub>             |
|-------------------|-----------|------------|----------------------------|--------------------------------------------|--------------------------------------------|---------------------------------------------|---------------------------------------------|
| Total energy / eV | -66440.98 | /          | -86655.18                  | -45687.18                                  | -78185.06                                  | -143178.97                                  | -208171.03                                  |
| /                 | /         | /          | S <sub>8</sub> @ZIF-67     | Al <sub>2</sub> S <sub>3</sub> @ZIF-67     | Al <sub>2</sub> S <sub>6</sub> @ZIF-67     | Al <sub>2</sub> S <sub>12</sub> @ZIF-67     | Al <sub>2</sub> S <sub>18</sub> @ZIF-67     |
| Total energy / eV | /         | -66504.36  | -153097.53                 | -112128.47                                 | -144627.38                                 | -209620.32                                  | -274612.50                                  |
| /                 | /         | /          | S <sub>8</sub> @ZIF-67-700 | Al <sub>2</sub> S <sub>3</sub> @ZIF-67-700 | Al <sub>2</sub> S <sub>6</sub> @ZIF-67-700 | Al <sub>2</sub> S <sub>12</sub> @ZIF-67-700 | Al <sub>2</sub> S <sub>18</sub> @ZIF-67-700 |
| Total energy / eV | /         | /          | -153162.85                 | -112193.45                                 | -144691.91                                 | -209685.50                                  | -274677.81                                  |

**Table S2.** Calculated binding energies and charge transfer of sulfur and intermediate polysulfides when adsorbing on ZIF-67 or ZIF-67-700.

|                                     | $S_8$  | $Al_2S_3$ | $Al_2S_6$ | $Al_2S_{12}$ | $Al_2S_{18}$ |
|-------------------------------------|--------|-----------|-----------|--------------|--------------|
| Binding energy on ZIF-67 / eV       | -1.38  | -0.31     | -1.34     | -0.37        | -0.50        |
| Binding energy on ZIF-67-700 / eV   | -3.31  | -1.91     | -2.49     | -2.17        | -2.42        |
| Charge transfer on ZIF-67 / $e$     | -0.161 | -0.131    | -0.369    | -0.227       | -0.495       |
| Charge transfer on ZIF-67-700 / $e$ | -1.174 | -0.703    | -1.065    | -1.060       | -1.078       |

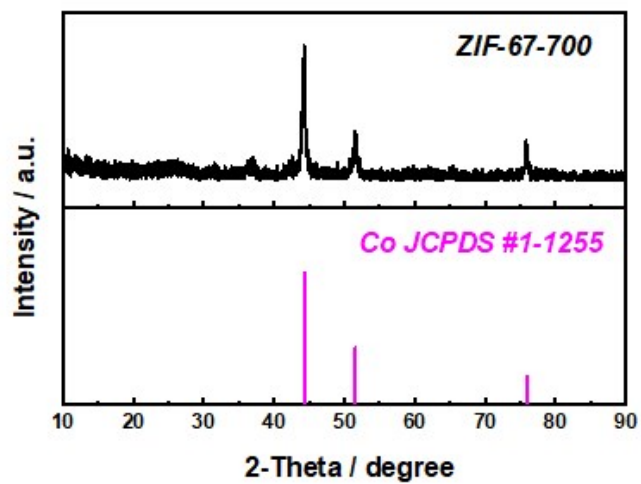

**Figure S1** XRD patterns of ZIF-67-700 and metal cobalt (JCPDS #1-1255)

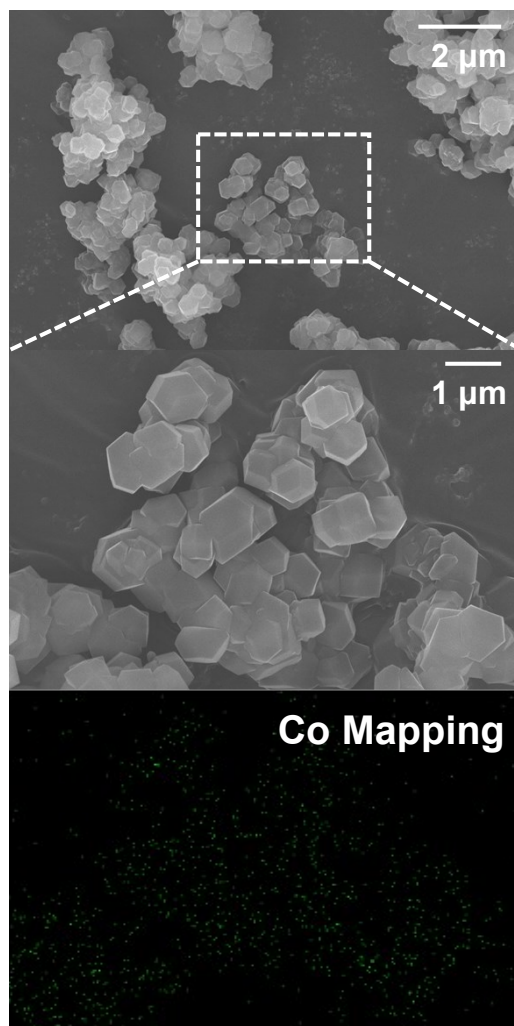

**Figure S2** SEM and EDS images of ZIF-67 polyhedrons.

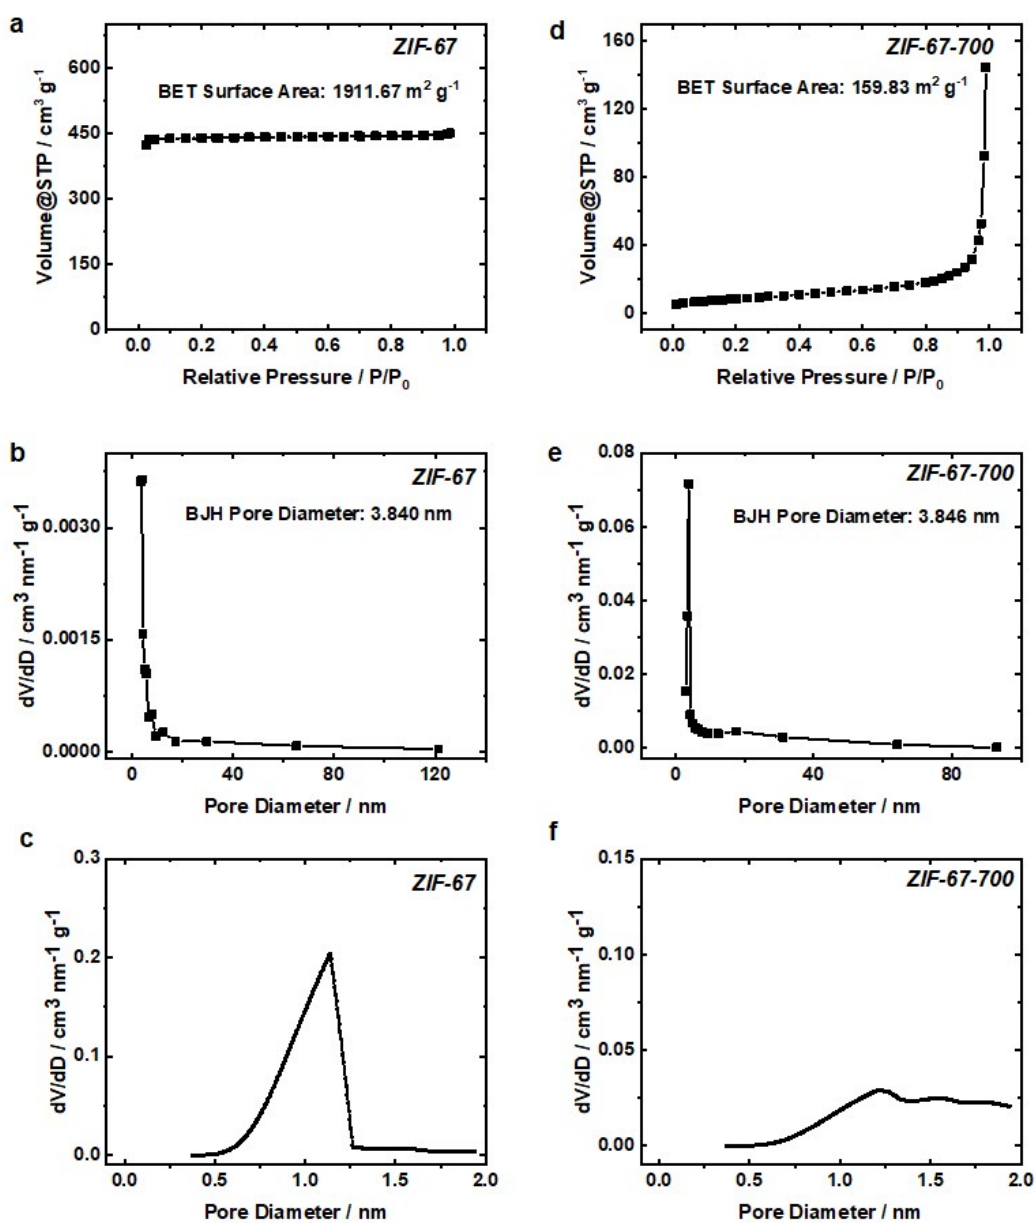

**Figure S3** (a, d) N<sub>2</sub> adsorption/desorption isotherm plots, (b, e) mesoporous size distribution calculated via BJH method, (c, f) microporous size distribution via HK method for ZIF-67 and ZIF-67-700, respectively.

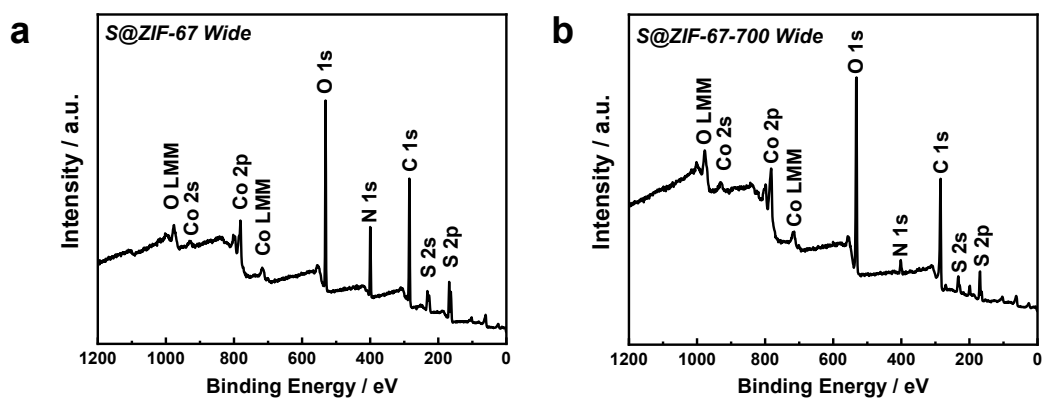

**Figure S4** XPS wide spectra of (a) S@ZIF-67 and (b) S@ZIF-67-700.

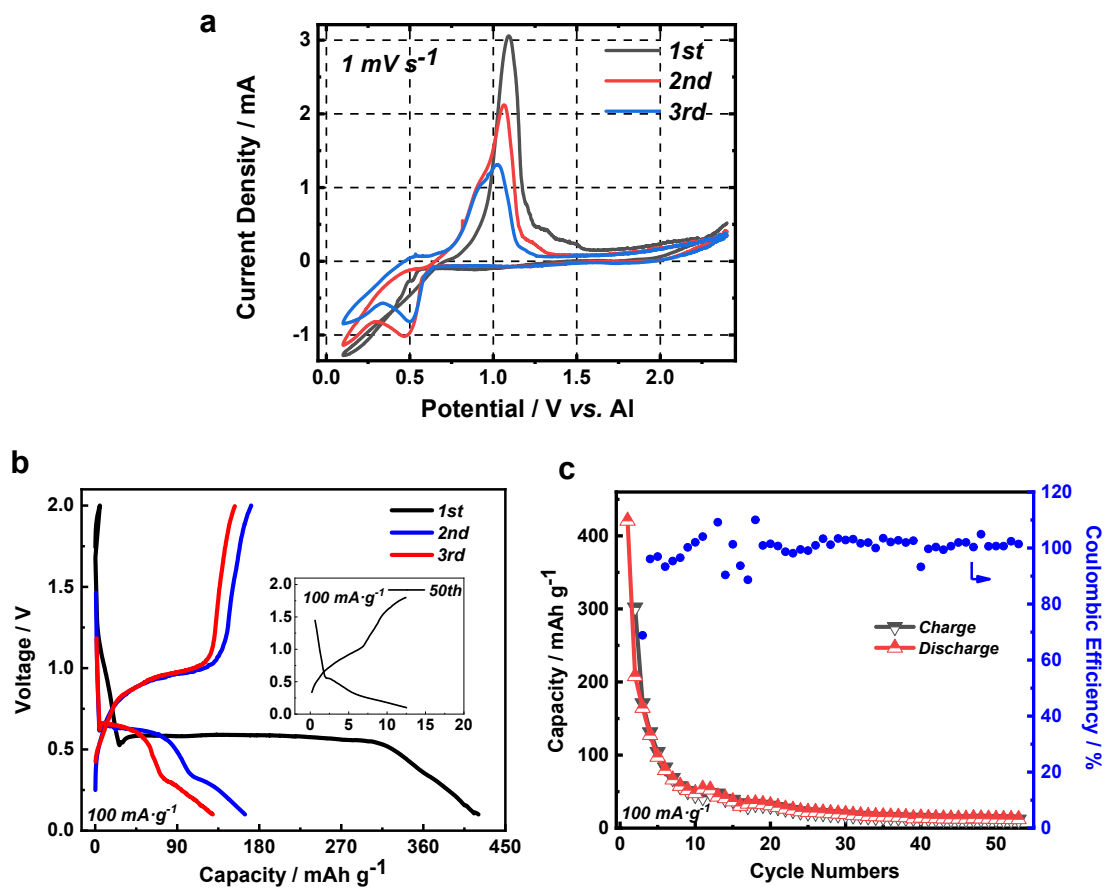

**Figure S5** (a) CV curve, (b) Charge and discharge voltage profiles, (c) Cycling performance of ZIF-67.



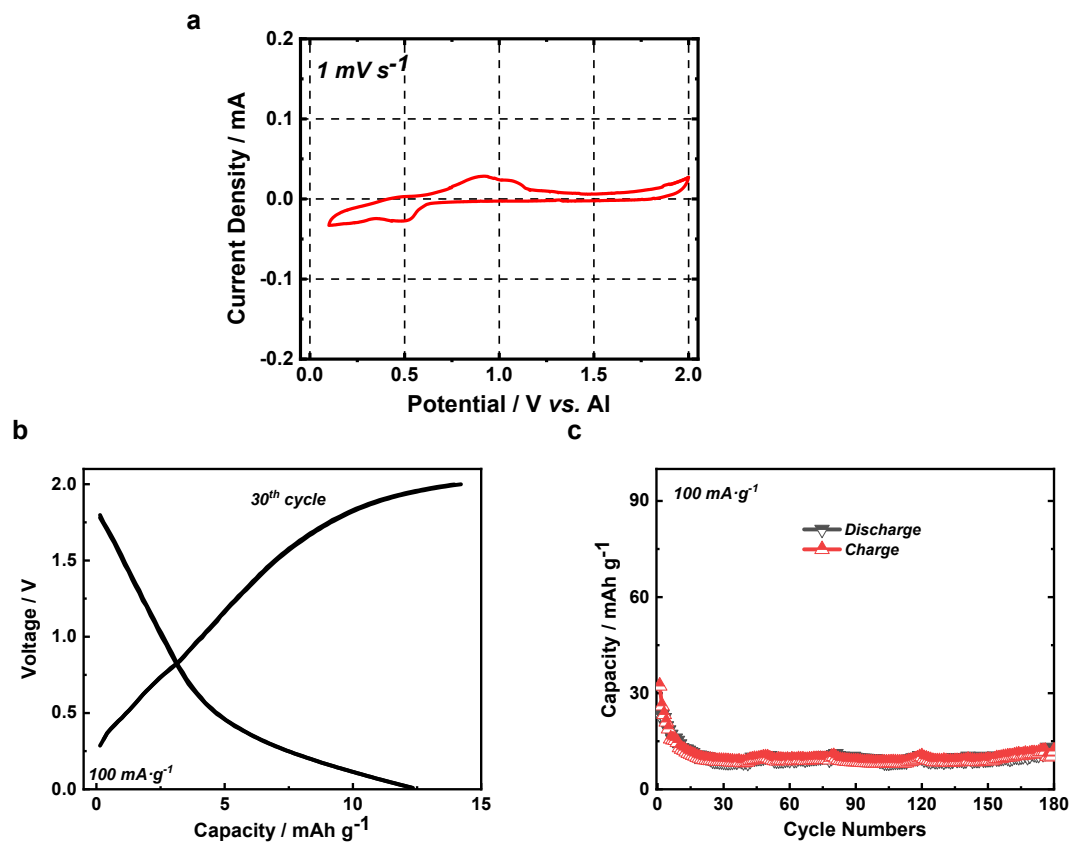

**Figure S6** (a) CV curve, (b) Charge and discharge voltage profiles, (c) Cycling performance of ZIF-67-700.

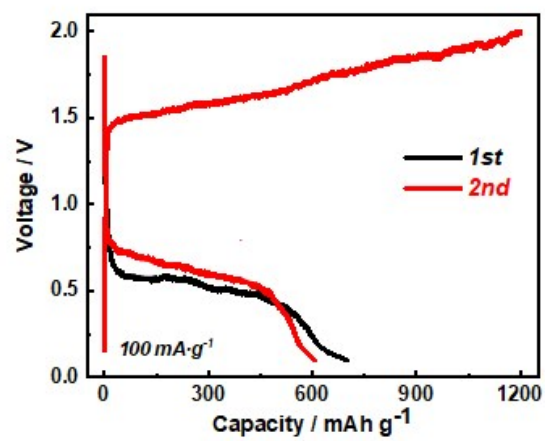

**Figure S7** Charge/discharge voltage profile of S@ZIF-67-700 at a current density of 100 mA

g<sup>-1</sup>.

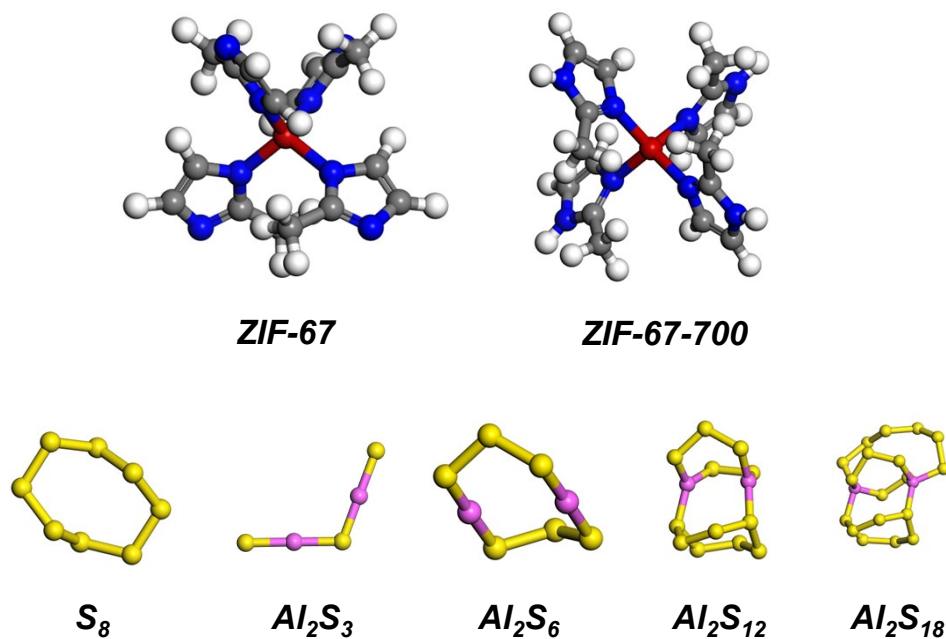

**Figure S8** Relaxed structures of ZIF-67, ZIF-67-700, S<sub>8</sub>, Al<sub>2</sub>S<sub>3</sub>, Al<sub>2</sub>S<sub>6</sub>, Al<sub>2</sub>S<sub>12</sub>, and Al<sub>2</sub>S<sub>18</sub>, respectively. Carbon, hydrogen, nitrogen, cobalt, sulfur, aluminum atoms were denoted using gray, white, blue, red, magenta, and yellow spheres, respectively.
